# Supplementary material for: Usability of augmented reality technology in tele-mentorship for managing clinical scenarios—A study protocol
Source: PubMed Central journal article supplement (PMC8970358; doi:10.1371/journal.pone.0266255), 2022-03-31
Supplement: pone.0266255.s001.pdf [file pone.0266255.s001.pdf]

## Ethics Approval Letter

06/10/2021

To: AssocProf Barnett

Project ID: 23343

Project Title: Usability of Augmented Reality technology in situational tele-mentorship for managing clinical scenarios: A feasibility study

The amendment received in support of the above named project has been approved by the University of Tasmania Human Research Ethics Committee on 06.10.2021.

Approval has been granted for the following documentation:

| Submission Document Name                                                     | Submission Document File Name                                                     | Submission Document Type            | Submission Document Date | Submission Document Version |
|------------------------------------------------------------------------------|-----------------------------------------------------------------------------------|-------------------------------------|--------------------------|-----------------------------|
| Responses to reviewers comments 10.12.20                                     | Responses to reviewers comments 10.12.20.docx                                     | EVIDENCE OF THE OUTCOME             | 10/12/2020               | 1                           |
| School approval 11.12.20                                                     | School approval 11.12.20.png                                                      | EVIDENCE OF THE OUTCOME             | 11/12/2020               | 1                           |
| Protocol_Project Description - Clean - 20210927                              | Protocol_Project Description - Clean - 20210927.docx                              | PROTOCOL                            | 27/09/2021               | 4                           |
| Appendix 6 - AR usability assessment - Mentors - Tracked - 20210707          | Appendix 6 - AR usability assessment - Mentors - Tracked - 20210707.docx          | QUESTIONNAIRE                       | 07/07/2021               | 2                           |
| Appendix 7 - AR usability assessment - Mentees - Tracked - 20210707          | Appendix 7 - AR usability assessment - Mentees - Tracked - 20210707.docx          | QUESTIONNAIRE                       | 07/07/2021               | 2                           |
| Appendix 8 - Mentorship Effectiveness Scale - Mentors - Tracked - 20210707tb | Appendix 8 - Mentorship Effectiveness Scale - Mentors - Tracked - 20210707tb.docx | QUESTIONNAIRE                       | 07/07/2021               | 2                           |
| Appendix 20 - General information - 20210927                                 | Appendix 20 - General information - 20210927.docx                                 | QUESTIONNAIRE                       | 27/09/2021               | 1                           |
| Appendix 22 - Evaluation of self-confidence - HE scenario - 20210927         | Appendix 22 - Evaluation of self-confidence - HE scenario - 20210927.docx         | QUESTIONNAIRE                       | 27/09/2021               | 1                           |
| Appendix 23 - Skill performance checklist - HE scenario - 20210927           | Appendix 23 - Skill performance checklist - HE scenario - 20210927.docx           | QUESTIONNAIRE                       | 27/09/2021               | 1                           |
| Appendix 21 - Scenario HE - 20210927                                         | Appendix 21 - Scenario HE - 20210927.docx                                         | OTHER PROJECT-RELATED DOCUMENTATION | 27/09/2021               | 1                           |
| Appendix 18 - Advert for mentee recruitment - Tracked - 20210927             | Appendix 18 - Advert for mentee recruitment - Tracked - 20210927.pptx             | ADVERTISING MATERIAL                | 27/09/2021               | 3                           |
| Appendix 18 - Advert for mentee recruitment - Clean - 20210927               | Appendix 18 - Advert for mentee recruitment - Clean - 20210927.pptx               | ADVERTISING MATERIAL                | 27/09/2021               | 3                           |
| Appendix 6 - AR usability assessment - Mentors - Clean - 20210707            | Appendix 6 - AR usability assessment - Mentors - Clean - 20210707.docx            | QUESTIONNAIRE                       | 07/07/2021               | 2                           |
| Appendix 7 - AR usability assessment - Mentees - Clean - 20210707            | Appendix 7 - AR usability assessment - Mentees - Clean - 20210707.docx            | QUESTIONNAIRE                       | 07/07/2021               | 2                           |
| Appendix 8 - Mentorship Effectiveness Scale - Mentors - Clean - 20210707tb   | Appendix 8 - Mentorship Effectiveness Scale - Mentors - Clean - 20210707tb.docx   | QUESTIONNAIRE                       | 07/07/2021               | 2                           |

|                                                                                              |                                                                                                   |                                          |            |   |
|----------------------------------------------------------------------------------------------|---------------------------------------------------------------------------------------------------|------------------------------------------|------------|---|
| Protocol Project Description - Tracked - 20210927                                            | Protocol Project Description - Tracked - 20210927.docx                                            | PROTOCOL (TRACKED)                       | 27/09/2021 | 4 |
| Appendix 1 - Participant Information Statement & Consent Form - Mentors - Tracked - 20211005 | Appendix 1 - Participant Information Statement & Consent Form - Mentors - Tracked - 20211005.docx | PARTICIPANT INFORMATION AND CONSENT FORM | 05/10/2021 | 4 |
| Appendix 1 - Participant Information Statement & Consent Form - Mentors - Clean - 20211005   | Appendix 1 - Participant Information Statement & Consent Form - Mentors - Clean - 20211005.docx   | PARTICIPANT INFORMATION AND CONSENT FORM | 05/10/2021 | 4 |
| Appendix 2 - Participant Information Statement & Consent Form - Mentees - Clean - 20211005   | Appendix 2 - Participant Information Statement & Consent Form - Mentees - Clean - 20211005.docx   | PARTICIPANT INFORMATION AND CONSENT FORM | 05/10/2021 | 5 |
| Appendix 2 - Participant Information Statement & Consent Form - Mentees - Tracked - 20211006 | Appendix 2 - Participant Information Statement & Consent Form - Mentees - Tracked - 20211006.docx | PARTICIPANT INFORMATION AND CONSENT FORM | 06/10/2021 | 5 |
| Response to ERM Ethics Committee Reviewer Comments 20211006                                  | Response to ERM Ethics Committee Reviewer Comments 20211006.docx                                  | OTHER PROJECT-RELATED DOCUMENTATION      | 06/10/2021 | 1 |

The University of Tasmania Human Research Ethics Committee has provided approval for the project to be conducted at the following sites:

Newnham campus Simulation and Clinical education training centre, School of Nursing

Please ensure that all investigators involved with this project have cited the approved versions of the documents listed within this letter and use only these versions in conducting this research project.

This approval constitutes ethical clearance by the University of Tasmania Human Research Ethics Committee. The decision and authority to commence the associated research may be dependent on factors beyond the remit of the ethics review process. For example, your research may need ethics clearance from other organisations or review by your research governance coordinator or Head of Department. It is your responsibility to find out if the approvals of other bodies or authorities are required. It is recommended that the proposed research should not commence until you have satisfied these requirements.

In accordance with the [National Statement on Ethical Conduct in Human Research](#), it is the responsibility of institutions and researchers to be aware of both general and specific legal requirements, wherever relevant. If researchers are uncertain they should seek legal advice to confirm that their proposed research is in compliance with the relevant laws. University of Tasmania researchers may seek legal advice from Legal Services at the University.

The University of Tasmania Human Research Ethics Committee (HREC) operates under and is required to comply with the National Statement on the Ethical Conduct in Human Research.

Therefore, the Chief Investigator's responsibility is to ensure that:

- (1) All investigators are aware of the terms of approval, and that the research is conducted in compliance with the HREC approved protocol or project description.
- (2) Modifications to the protocol do not proceed until **approval** is obtained in writing from the HREC. This includes, but is not limited to, amendments that:
  - (i) are proposed or undertaken in order to eliminate immediate risks to participants;
  - (ii) may increase the risks to participants;
  - (iii) significantly affect the conduct of the research; or
  - (iv) involve changes to investigator involvement with the project.

Please note that all requests for changes to approved documents must include a version number and date when submitted for review by the HREC.

- (3) Reports are provided to the HREC on the progress of the research and any safety reports or monitoring requirements as indicated in NHMRC guidance.

Guidance for the appropriate forms for reporting such events in relation to clinical and non-clinical trials and innovations can be located under the ERM "Help Tab" in "Templates". All adverse events must be reported regardless of whether or not the event, in your opinion, is a direct effect of the therapeutic goods being tested.

- (4) The HREC is informed as soon as possible of any new safety information, from other published or unpublished research, that may have an impact on the continued ethical acceptability of the research or that may indicate the need for modification of the project.

- (5) All research participants must be provided with the current Participant Information Sheet and Consent Form, unless otherwise approved by the Committee.

- (6) This study has approval for four years contingent upon annual review. A Progress Report is to be provided on the anniversary date of your approval. Your first report is due on the anniversary of your approval, and you will be sent a courtesy reminder closer to this due date. Ethical approval for this project will lapse if a Progress Report is not submitted in the time frame provided.

- (7) A Final Report and a copy of the published material, either in full or abstract, must be provided at the end of the project.
- (8) The HREC is advised of any complaints received or ethical issues that arise during the course of the project.
- (9) The HREC is advised promptly of the emergence of circumstances where a court, law enforcement agency or regulator seeks to compel the release of findings or results. Researchers must develop a strategy for addressing this and seek advice from the HREC.

Kind regards,

Ethics Executive Officer

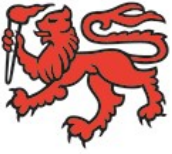

UNIVERSITY *of*  
TASMANIA
